1 **C-type lectin-like receptor 2 (CLEC-2)-dependent DC migration is controlled by**  
2 **tetraspanin CD37**

3

4 **Charlotte M de Winde<sup>1,2</sup>, Alexandra L Matthews<sup>3,\*</sup>, Sjoerd van Deventer<sup>1,\*</sup>, Alie van der Schaaf<sup>1</sup>, Neil D**  
5 **Tomlinson<sup>4</sup>, Erik Jansen<sup>1</sup>, Johannes A Eble<sup>5</sup>, Bernhard Nieswandt<sup>6</sup>, Helen M McGettrick<sup>7</sup>, Carl G Figdor<sup>1</sup>,**  
6 **Sophie E Acton<sup>2,#</sup>, Michael G Tomlinson<sup>3,8#</sup>, Annemiek B van Spriel<sup>1,5</sup>**

7

8 <sup>1</sup>Radboud university medical center, Radboud Institute for Molecular Life Sciences, Department of Tumor  
9 Immunology, Nijmegen, The Netherlands. <sup>2</sup>MRC Laboratory of Molecular Cell Biology, University College London,  
10 London, United Kingdom. <sup>3</sup>School of Biosciences, University of Birmingham, Birmingham, United Kingdom. <sup>4</sup>Institute  
11 of Cardiovascular Sciences, University of Birmingham, Birmingham, United Kingdom. <sup>5</sup>Institute for Physiological  
12 Chemistry and Pathobiochemistry, Münster, Germany. <sup>6</sup>University Clinic of Würzburg & Rudolf Virchow Center,  
13 Würzburg, Germany. <sup>7</sup>Institute of Inflammation and Ageing, University of Birmingham, Birmingham, United Kingdom.  
14 <sup>8</sup>Centre of Membrane Proteins and Receptors (COMPARE), Universities of Birmingham and Nottingham, Midlands,  
15 United Kingdom.

16

17 <sup>\*,#</sup>Authors contributed equally to the work

18 <sup>5</sup>Corresponding author; [annemiek.vanspriel@radboudumc.nl](mailto:annemiek.vanspriel@radboudumc.nl)

19

20 **Running title:**

21 CD37 controls CLEC-2 on DCs

22

23 **Key words:**

24 CLEC-2, dendritic cell, migration, membrane organization, tetraspanin

25 **Abstract**

26 Cell migration is central to evoke a potent immune response. Dendritic cell (DC) migration to lymph nodes  
27 is dependent on the interaction of C-type lectin-like receptor 2 (CLEC-2) expressed by DCs, with podoplanin  
28 expressed by lymph node stromal cells (LNSCs). However, the underlying molecular mechanisms by which  
29 CLEC-2 influences DC migration remain elusive. Here, we show that CLEC-2-dependent DC migration is  
30 tightly controlled by tetraspanin CD37, a membrane-organizing protein. Our findings demonstrate a  
31 specific molecular interaction between CLEC-2 and CD37. Myeloid cells lacking CD37 (*Cd37*<sup>-/-</sup>) expressed  
32 less CLEC-2 on their surface compared to wild-type cells, indicating that CD37 is required to stabilize  
33 membrane expression of CLEC-2. In addition, CLEC-2-expressing DCs lacking CD37 showed impaired  
34 adhesion, migration velocity and displacement on LNSCs. Moreover, *Cd37*<sup>-/-</sup> DCs failed to form actin  
35 protrusions in a 3D collagen matrix upon podoplanin-induced CLEC-2 stimulation, phenocopying CLEC-2-  
36 deficient DCs (CD11c<sup>ΔCLEC-2</sup>). Microcontact printing experiments revealed that CD37 is required for CLEC-2  
37 recruitment in the membrane to its ligand podoplanin. This study demonstrates that tetraspanin CD37  
38 controls CLEC-2 membrane organization and provides new molecular insights underlying CLEC-2-  
39 dependent DC migration.

## 40 Introduction

41 Cell migration is a key process in the initiation of immune responses (Worbs et al., 2017). Upon  
42 encountering a foreign antigen, dendritic cells (DCs) migrate to secondary lymphoid organs (i.e. lymph  
43 nodes, spleen) to present antigen on major histocompatibility complex (MHC) and activate T and B  
44 lymphocytes. En route, DCs move along podoplanin-expressing lymph node stromal cells (LNSCs), such as  
45 lymphatic endothelial cells (LECs) and fibroblastic reticular cells (FRCs). The interaction between C-type  
46 lectin-like receptor 2 (CLEC-2) on DCs with podoplanin on LNSCs is essential for optimal DC migration to  
47 and within the lymph node (Acton et al., 2012). Despite the important role of CLEC-2 in DC migration, the  
48 molecular mechanisms underlying CLEC-2-dependent cell migration remain to be elucidated.

49 CLEC-2 (encoded by the gene *Clec1b*) is expressed on platelets (Suzuki-Inoue et al., 2006) and  
50 myeloid immune cells, such as DCs, macrophages and neutrophils (Colonna et al., 2000; Lowe et al., 2015;  
51 Mourão-Sá et al., 2011). CLEC-2 plays a key role in fetal development of the lymphatic vasculature, as  
52 demonstrated by *Clec1b*-knockout mice which are embryonically lethal (Bertozzi et al., 2010; Suzuki-Inoue  
53 et al., 2010). Besides podoplanin, the snake venom toxin rhodocytin is another ligand for CLEC-2. Both  
54 ligands initiate downstream signaling via Syk resulting in cell activation (Fuller et al., 2007; Hughes et al.,  
55 2010; Suzuki-Inoue et al., 2006). Intracellular Syk-binding requires dimerization of CLEC-2 receptors, since  
56 each CLEC-2 receptor contains only a single tyrosine phosphorylation (YXXL) motif. This makes CLEC-2 a  
57 hemITAM (hemi-Immunoreceptor Tyrosine-based Activation Motif) C-type lectin receptor (CLR), similar to  
58 its homologous family member Dectin-1 (CLEC7A) that recognizes  $\beta$ -glucans in fungal cell walls (Brown and  
59 Gordon, 2001; Fuller et al., 2007).

60 The organization of receptors in the plasma membrane of DCs plays a pivotal role in immune cell  
61 function (Zuidscherwoude et al., 2014; Zuidscherwoude et al., 2017a). For proper ligand binding and  
62 initiation of signaling, CLRs are dependent on localization into membrane microdomains, such as lipid rafts  
63 and tetraspanin-enriched microdomains (TEMs) (Figdor and van Sriel, 2009; Zuidscherwoude et al.,  
64 2014). TEMs, also referred to as the tetraspanin web, are formed by the interaction of tetraspanins, a  
65 family of four-transmembrane proteins, with each other and partner proteins (Charrin et al., 2009; Hemler,  
66 2005; Levy and Shoham, 2005; Zimmerman et al., 2016; Zuidscherwoude et al., 2015). As such, TEMs have  
67 been implicated in fundamental cell biological functions, including proliferation, adhesion and signaling  
68 (Charrin et al., 2009; Hemler, 2005; Levy and Shoham, 2005). Earlier work indicated that CLEC-2 clustering  
69 and signaling in blood platelets is dependent on lipid rafts (Manne et al., 2015; Pollitt et al., 2010). CLEC-2  
70 was shown to be present as single molecules or homodimers on resting platelets, and larger clusters were  
71 formed upon rhodocytin stimulation (Hughes et al., 2010; Pollitt et al., 2014), but the molecular

72 mechanism underlying ligand-induced CLEC-2 clustering is yet unknown. More is known about the  
73 organization of Dectin-1, a CLEC-2 homologous family member, on immune cells. Dectin-1 molecules need  
74 to be reorganized into a “phagocytic cup” to bind and phagocytose particulate, and not soluble,  $\beta$ -glucan  
75 (Goodridge et al., 2011). Furthermore, Dectin-1 has been proposed to be present in lipid rafts (De Turris  
76 et al., 2015; Xu et al., 2009) or tetraspanin (CD63, CD37) microdomains (Mantegazza et al., 2004; Meyer-  
77 Wentrup et al., 2007; Yan et al., 2014) on myeloid cells.

78 Tetraspanin CD37 is exclusively expressed on immune cells with highest expression on B  
79 lymphocytes and DCs (de Winde et al., 2015). The importance of CD37 in the immune system has been  
80 demonstrated in CD37-deficient mice (*Cd37*<sup>-/-</sup>) that have defective humoral and cellular immune  
81 responses (van Spriël et al., 2004; van Spriël et al., 2012). Interestingly, DCs that lack CD37 showed  
82 impaired spreading, adhesion and migration, leading to defective initiation of the cellular immune  
83 response (Gartlan et al., 2013; Jones et al., 2016). Since CLEC-2 plays an important role in DC migration  
84 (Acton et al., 2012), and its homologous receptor Dectin-1 has been shown to interact with tetraspanin  
85 CD37 (Meyer-Wentrup et al., 2007), we hypothesized that CD37 may influence CLEC-2 membrane  
86 organization and thereby controls DC migration. In this study, we show that CLEC-2 interacts with CD37.  
87 Moreover, CLEC-2-dependent actin protrusion formation by DCs and recruitment of CLEC-2 to podoplanin  
88 is dependent on CD37 expression. These results provide evidence that tetraspanin CD37 is required for  
89 CLEC-2 recruitment in the plasma membrane in response to podoplanin, and as such plays an important  
90 role in CLEC-2-dependent DC migration.

## 91 **Results**

### 92 *CLEC-2 interacts with tetraspanin CD37*

93 To investigate whether CLEC-2 interacts with tetraspanins, we performed co-immunoprecipitation  
94 experiments with HEK-293T cells transfected with human CLEC-2-MYC with or without a range of FLAG-  
95 tagged human tetraspanin constructs. These experiments revealed that CLEC-2 interacts with CD37, but  
96 not with four other tetraspanins used as controls (CD9, CD63, CD151 or CD81) under conditions using 1%  
97 digitonin (Figure 1A-B). Interactions preserved in 1% digitonin are associated with primary (direct)  
98 interactions between a tetraspanin and its partner proteins (Serru et al., 1999). The strength of the  
99 interaction between CD37 and CLEC-2 was comparable with two well-established primary interactions  
100 between tetraspanins and their partner proteins: CD9 with CD9P1 (Charrin et al., 2001) and Tspan14 with  
101 ADAM10 (Dornier et al., 2012; Haining et al., 2012) (Figure 1C-D). Thus, these experiments show that CLEC-  
102 2 specifically interacts with tetraspanin CD37.

103

### 104 *CD37-deficient myeloid cells show decreased CLEC-2 surface expression and increased CLEC-2-dependent* 105 *IL-6 production*

106 We investigated CLEC-2 membrane expression on immune cells of *Cd37*<sup>-/-</sup> mice. Naïve *Cd37*<sup>-/-</sup> myeloid  
107 cells expressed significantly lower CLEC-2 levels compared to *Cd37*<sup>+/+</sup> (WT) splenocytes (Figure 2A). It was  
108 reported that CLEC-2 expression was increased on myeloid cells upon *in vivo* LPS stimulation (Lowe et al.,  
109 2015; Mourão-Sá et al., 2011). Therefore, we analyzed CLEC-2 expression on different immune cell subsets  
110 from spleens of *Cd37*<sup>-/-</sup> and WT mice that were stimulated with LPS *in vivo*. CLEC-2 membrane expression  
111 was substantially increased by LPS, but this increase was significantly lower on LPS-stimulated *Cd37*<sup>-/-</sup>  
112 myeloid cells (DCs, macrophages, granulocytes), compared to WT myeloid cells (Figure 2B-C). This was in  
113 contrast to LPS-stimulated WT and *Cd37*<sup>-/-</sup> lymphoid cells (B cells, T cells and NK cells) that expressed  
114 comparable CLEC-2 levels (Figure 2C). As a control, we investigated CLEC-2 expression on mouse platelets,  
115 which do not express CD37 (Zeiler et al., 2014), and observed similar CLEC-2 expression on platelets of WT  
116 and *Cd37*<sup>-/-</sup> mice (Supplementary Figure 1).

117 Next, we investigated whether decreased CLEC-2 expression on *Cd37*<sup>-/-</sup> immune cells had  
118 functional consequences by analyzing cytokine production. *Cd37*<sup>-/-</sup> splenocytes produced significantly  
119 more interleukin-6 (IL-6) compared to WT splenocytes upon stimulation with the CLEC-2 ligand rhodocytin  
120 (Figure 2D). This was not due to a general defect of the *Cd37*<sup>-/-</sup> immune cells since stimulating these cells  
121 with PMA/ionomycin resulted in equivalent IL-6 production compared to WT cells (Figure 2D). Thus,

122 presence of CD37 is important for regulation of CLEC-2 membrane expression on myeloid cells and CD37  
123 inhibits CLEC-2-dependent cytokine production.

124

#### 125 *CD37 controls DC migration and protrusion formation in response to podoplanin*

126 To investigate whether CD37 was required for the migratory capacity of CLEC-2-expressing (CLEC-2<sup>+</sup>) DCs,  
127 we performed static adhesion and migration assays of WT and *Cd37*<sup>-/-</sup> CLEC-2<sup>+</sup> (LPS-stimulated) DCs on  
128 LECs (Figure 3A). Adhesion of both WT and *Cd37*<sup>-/-</sup> CLEC-2<sup>+</sup> DCs to inflamed (TNF $\alpha$ -stimulated) LECs was  
129 stable for the duration of the experiment. Interestingly, the percentage of *Cd37*<sup>-/-</sup> DCs adhering to the  
130 inflamed LECs was reduced when compared to WT DCs (Figure 3B). Moreover, migration velocity and mean  
131 square displacement of DCs were significantly decreased in absence of CD37 (Figure 3C-D, Supplementary  
132 movies 1A-B).

133 To investigate whether cell morphological changes underlying DC migration are CLEC-2-  
134 dependent, we analyzed the ability of DCs to form protrusions in response to the CLEC-2 ligand podoplanin  
135 in a 3D collagen matrix. In response to podoplanin, the protrusion length and morphology index of WT DCs  
136 was significantly increased compared to unstimulated cells, as previously described (Acton et al., 2012)  
137 (Figure 4A,C-D and Supplementary Figure 2). DCs lacking CD37 were capable of forming short actin  
138 protrusions (Figure 4A-B, Supplementary Figure 2). However, *Cd37*<sup>-/-</sup> DCs, despite expressing similar levels  
139 of CLEC-2 (data not shown), were unable to increase protrusion length and morphology index in response  
140 to podoplanin, instead phenocopying the defect seen in DCs lacking CLEC-2 (*CD11c* <sup>$\Delta$ CLEC-2</sup>; (Acton et al.,  
141 2012; Acton et al., 2014)) (Figure 4A,C-D). Together, these results demonstrate that CD37-deficiency,  
142 similar to CLEC-2-deficiency, results in aberrant DC adhesion and migration on LNSCs, and decreased actin  
143 protrusion formation in response to the CLEC-2 ligand podoplanin.

144

#### 145 *CLEC-2 recruitment to podoplanin is dependent on CD37*

146 To gain insight into the underlying mechanism by which CD37 controls CLEC-2 response to podoplanin, we  
147 analyzed local CLEC-2 recruitment to podoplanin in the presence or absence of CD37 by microcontact  
148 printing experiments. Microcontact printing ("stamping") technology (Van Den Dries et al., 2012;  
149 Zuidschewoude et al., 2017b) enables imaging and analysis of CLEC-2 protein recruitment in the  
150 membrane of cells towards recombinant podoplanin protein that is stamped as circular spots (5 $\mu$ m) on  
151 glass coverslips. Myeloid cells (RAW264.7 macrophages) were transiently transfected with murine CLEC-2  
152 tagged to GFP (GFP-mCLEC-2) with or without murine CD37 tagged to mCherry (mCD37-mCherry) (Figure  
153 5A and Supplementary Figure 3A), and incubated on coverslips with podoplanin stamps to locally engage

154 CLEC-2 molecules at sites of podoplanin. We determined CLEC-2 membrane expression in the transfected  
155 cells to control for differences in transfection efficiency. CLEC-2 membrane expression was comparable  
156 between cells transfected with or without mCD37-mCherry (Figure 5B). Cells expressing both GFP-mCLEC-  
157 2 and mCD37-mCherry showed a >2-fold higher percentage of cells with local (on-stamp) CLEC-2  
158 enrichment at sites of podoplanin, compared to cells only expressing GFP-mCLEC-2 (Figure 5C-D,  
159 Supplementary Figure 3B). These data indicate that CD37 significantly enhances CLEC-2 recruitment to  
160 podoplanin.  
161

## 162 Discussion

163 It is well-established that CLEC-2 interaction with podoplanin is essential for DC migration and initiation of  
164 the cellular immune response (Acton et al., 2012; Acton et al., 2014; Astarita et al., 2015), still the  
165 molecular mechanisms underlying this remain elusive. We identified a novel molecular interaction  
166 between CLEC-2 and CD37, which was specific for CD37 as other tetraspanins (CD9, CD63, CD81 and  
167 CD151) did not interact with CLEC-2. We discovered that DCs lacking CD37 have decreased CLEC-2  
168 expression at the cell surface, and impaired adhesion, migration velocity and displacement on podoplanin-  
169 expressing lymph node stromal cells. Moreover, podoplanin-induced formation of actin protrusions and  
170 recruitment of CLEC-2 to podoplanin was impaired in *Cd37*<sup>-/-</sup> DCs.

171 For efficient ligand binding and activation of downstream signaling, CLRs have been postulated to  
172 depend on spatiotemporal localization into specific microdomains on the plasma membrane (Cambi et al.,  
173 2004; Figdor and van Sriel, 2009; Meyer-Wentrup et al., 2007). CLEC-2 has found to be present in clusters  
174 on blood platelets (Hughes et al., 2010; Pollitt et al., 2014) and CLEC-2 clusters were reported to be  
175 localized in lipid rafts (Manne et al., 2015; Pollitt et al., 2010) by using detergent-resistant membrane  
176 extraction. However, this technique also enriches for tetraspanin microdomains (Blank et al., 2007; Claas  
177 et al., 2001; Tarrant et al., 2003). We now identified a specific molecular interaction between CLEC-2 and  
178 tetraspanin CD37 indicating that CD37 microdomains form the scaffold for CLEC-2 clusters on the plasma  
179 membrane of DCs. The finding that CLEC-2 did not interact with other tetraspanins may be explained by  
180 recent super-resolution studies of the tetraspanin web in which individual tetraspanins were found in  
181 separate nanoclusters (100-120nm) at the cell surface of B cells and DCs (Zuidscherwoude et al., 2015).  
182 Our data are in line with the demonstration that expression and stabilization of the CLEC-2 homologous  
183 family member Dectin-1 at the plasma membrane of macrophages was dependent on CD37 (Meyer-  
184 Wentrup et al., 2007). The role of CD37 in stabilizing CLRs on the plasma membrane may also underlie our  
185 finding that CLEC-2 surface expression is decreased on *Cd37*<sup>-/-</sup> splenocytes compared to WT splenocytes,  
186 indicating that CLEC-2 turnover is increased in absence of CD37.

187 Our results show that CLEC-2<sup>+</sup> *Cd37*<sup>-/-</sup> DCs have an impaired capacity to adhere to podoplanin-  
188 expressing LECs, and demonstrate lower migration velocity and displacement. This is in accordance with  
189 studies showing impaired migration of *Cd37*<sup>-/-</sup> DCs *in vivo* (Gartlan et al., 2013; Jones et al., 2016). In DC  
190 biology, tetraspanin interactions with adhesion receptors or MHC molecules are particularly important for  
191 antigen presentation and T cell activation (Gartlan et al., 2010; Jones et al., 2016; Rocha-Perugini et al.,  
192 2017; Sheng et al., 2009). Now, we demonstrate a specific role for CD37 in controlling CLEC-2 function in  
193 migration of DCs. *Cd37*<sup>-/-</sup> DCs show impaired actin protrusion formation upon podoplanin stimulation,



194 which is highly similar to the phenotype of CD11c<sup>ΔCLEC-2</sup> DCs. Rearrangements of the actin cytoskeleton and  
195 subsequent cell movement are controlled by Rho GTPases, including RhoA and Rac1. RhoA increases  
196 actomyosin contractility via its interaction with Rho kinases (Parri and Chiarugi, 2010), whereas Rac1  
197 supports actin polymerization, spreading of lamellipodia and formation of membrane ruffles (Nobes and  
198 Hall, 1995; Olson and Sahai, 2009). Since activity of Rho GTPases has been shown to change upon CLEC-2  
199 activation by podoplanin or rhodocytin (i.e. downregulation of RhoA and upregulation of Rac1) (Acton et  
200 al., 2012), we postulate that the underlying molecular mechanism of the defective cell migration of *Cd37*-  
201 *-* DCs is due to deregulation of intracellular Rho GTPases as a consequence of impaired recruitment of  
202 CLEC-2 to its ligand podoplanin. This is supported by a recent study demonstrating impaired activation of  
203 Rac-1 in toxin-activated adherent *Cd37*-*-* bone marrow-derived DCs (Jones et al., 2016). Altogether, these  
204 data support a model in which CD37 is important for CLEC-2 recruitment in the plasma membrane of  
205 myeloid cells upon podoplanin binding, which results in Syk activation and changes in Rho GTPase activity  
206 (e.g. increased Rac1 and decreased RhoA activation) leading to cell migration (Figure 5E).

207 Besides activation of Rho GTPases, CLRs can initiate intracellular Syk-dependent signaling cascades  
208 that induce cytokine production (Mócsai et al., 2010). We found that *Cd37*-*-* myeloid cells produce higher  
209 IL-6 levels compared to WT cells upon stimulation with the CLEC-2 ligand rhodocytin, which is in line with  
210 previous reports showing production of pro-inflammatory cytokines (i.e. IL-6 and TNF $\alpha$ ) by neutrophils and  
211 RAW macrophages upon stimulation with rhodocytin (Chang et al., 2010; Kerrigan et al., 2009). Increased  
212 IL-6 expression upon CLR stimulation has also been shown in *Cd37*-*-* macrophages upon stimulation with  
213 the Dectin-1 ligand curdlan (Meyer-Wentrup et al., 2007). Additionally, IL-10 production by RAW  
214 macrophages and BMDCs co-stimulated with LPS and anti-CLEC-2 Fab fragments could be reversed by Syk  
215 inhibition (Mourão-Sá et al., 2011). Our results suggest that CD37 directly controls Syk signaling  
216 downstream of hemITAM CLRs and as such inhibits cytokine production, probably by stimulating  
217 phosphatase activity (Carmo and Wright, 1995; Chattopadhyay et al., 2003; Wright et al., 2004). Syk  
218 activation has been reported to be negatively regulated by SH2 domain-containing protein tyrosine  
219 phosphatase 1 (SHP1) (Mócsai et al., 2010; Zhang et al., 2000). SHP1 and CD37 have been shown to  
220 associate via the N-terminal ITIM-like domain of CD37 in chronic lymphocytic leukemia cells, which  
221 induced tumor cell death via negative regulation of AKT-mediated pro-apoptotic signaling (Lapalombella  
222 et al., 2012). The binding of cytoplasmic signaling proteins, like protein kinase C (PKC) (Zhang et al., 2001;  
223 Zuidscherwoude et al., 2017b), Rac1 (Tejera et al., 2013), and suppressor of cytokine signaling 3 (SOCS3)  
224 (de Winde et al., 2016) have been reported for different tetraspanins (also reviewed in (van Deventer et  
225 al., 2017)).

226            In conclusion, our results demonstrate that CD37 is required for ligand-induced CLEC-2 responses  
227            via a direct molecular interaction leading to immune cell activation and DC migration. Furthermore, this  
228            study supports a general mechanism of tetraspanin-mediated membrane organization and movement of  
229            CLRs in the plasma membrane, which underlies cytoskeletal changes and cell migration.

## 230 **Materials and methods**

### 231 *Mice*

232 *Cd37*<sup>-/-</sup> mice (male, average age of three months) were generated by homologous recombination  
233 (Knobeloch et al., 2000) and fully backcrossed to the C57BL/6J background (van Spriel et al., 2004).  
234 *Cd37*<sup>+/+</sup> (WT) littermates were matched for age and gender. *Cd37*<sup>+/+</sup> and *Cd37*<sup>-/-</sup> mice were bred in the  
235 Central Animal Laboratory of Radboud University Medical Center. CD11c<sup>ΔCLEC-2</sup> mice (C57BL/6J  
236 background), selectively lacking CLEC-2 in CD11c<sup>+</sup> cells, were generated by crossing *Cd11c*-cre and  
237 *Clec1bfl/fl* mice as previously described (Acton et al., 2014). All murine studies complied with European  
238 legislation (directive 2010/63/EU of the European Commission) and were approved by local authorities  
239 (CCD, The Hague, the Netherlands, and Institutional Animal Ethics Committee Review Board, Cancer  
240 Research UK and the UK Home Office, United Kingdom) for the care and use of animals with related codes  
241 of practice. All mice were housed in top-filter cages and fed a standard diet with freely available water and  
242 food.

243

### 244 *Isolation of whole blood*

245 Mice were anesthetized with isoflurane and whole blood was harvested via retro-orbital puncture and  
246 collected in a tube containing acid-citrate-dextrose mixture (ACD; 25g/L sodium citrate, 20g/L glucose  
247 (both from Sigma-Aldrich, Zwijndrecht, The Netherlands) and 15g/L citric acid (Merck, Amsterdam, The  
248 Netherlands) to prevent clotting.

249

### 250 *Cell culture*

251 Bone marrow-derived DCs (BMDCs) were generated by culturing total murine bone marrow cells in  
252 complete medium (RPMI 1640 medium (Gibco, via Thermo Fisher Scientific, Bleiswijk, The Netherlands),  
253 10% fetal calf serum (FCS; Greiner Bio-One, Alphen a/d Rijn, The Netherlands), 1% UltraGlutamine-I (UG;  
254 Lonza, Breda, The Netherlands), 1% antibiotic-antimycotic (AA; Gibco, via Thermo Fisher Scientific,  
255 Bleiswijk, The Netherlands) and 50μM β-mercapto-ethanol (Sigma-Aldrich, Zwijndrecht, The Netherlands),  
256 containing 20ng/mL murine granulocyte-macrophage colony stimulating factor (mGM-CSF; Peprotech, via  
257 Bio-Connect, Huissen, The Netherlands), as adapted from previously described protocols (Lutz et al., 1999).  
258 On day 6, BMDCs were additionally stimulated with 10ng/mL LPS (Sigma-Aldrich, Zwijndrecht, The  
259 Netherlands) for 24h, unless stated otherwise.

260 Primary human dermal lymphatic endothelial cells (LEC) were purchased from PromoCell and  
261 cultured in manufacturer's recommended medium (Endothelial Cell Growth Medium MV2, PromoCell,

262 Heidelberg, Germany) supplemented with 35µg/mL gentamicin (Gibco, via Fisher Scientific - UK Ltd,  
263 Loughborough, UK). As previously described (Ahmed et al., 2011), LECs were dissociated using a 2:1 ratio  
264 of trypsin (2.5mg/ml) to EDTA (0.02%) (both from Sigma-Aldrich, Paisley, UK) and seeded on 12-well tissue  
265 culture plates coated with 2% gelatin (Sigma-Aldrich, Paisley, UK). Seeding density was chosen to yield a  
266 confluent LEC monolayer within 24h. TNF-alpha (TNFα; 100U/ml; R&D Systems, via Bio-Techne Ltd,  
267 Abingdon, UK) was added to confluent LEC monolayers for 24h before analyzing static adhesion and  
268 migration of DCs (Johnson and Jackson, 2013; Maddaluno et al., 2009; Podgrabinska et al., 2009).

269 RAW264.7 murine macrophages (RAW; originally from ATCC) were cultured in RPMI 1640 medium  
270 (Gibco, via Thermo Fisher Scientific, Bleiswijk, The Netherlands) supplemented with 10% FCS (Greiner Bio-  
271 One, Alphen a/d Rijn, The Netherlands), 1% UG (Lonza, Breda, The Netherlands) and 1% AA (Gibco, via  
272 Thermo Fisher Scientific, Bleiswijk, The Netherlands). The human embryonic kidney (HEK)-293T (HEK-293  
273 cells expressing the large T-antigen of simian virus 40) cell line was cultured in complete DMEM medium  
274 (Sigma-Aldrich, Zwijndrecht, The Netherlands) containing 10% fetal calf serum (Gibco, via Thermo Fisher  
275 Scientific, Loughborough, UK), 4mM L-glutamine, 100U/ml penicillin and 100µg/ml streptomycin (Thermo  
276 Fisher Scientific, Loughborough, UK).

277

### 278 *Constructs and transfection*

279 mCD37-pmCherry was generated by fluorescent protein swap of GFP from mCD37-pEGFP (Meyer-  
280 Wentrup et al., 2007) with mCherry from pmCherry-N1 (Clontech, via Takara Bio Europe, Saint-Germain-  
281 en-Laye, France) using AgeI and BsrGI restriction sites (New England Biolabs (via Bioké, Leiden, The  
282 Netherlands)). RAW macrophages ( $5 \times 10^5$  cells/transfection) were transfected with 0.5µg mCD37-mCherry  
283 and/or 0.5µg pAcGFP-mCLEC-2 as previously described (Pollitt et al., 2014) using FuGENE HD according to  
284 manufacturer's instructions (Promega, Leiden, The Netherlands).

285 Human (h)CLEC-2-MYC construct with C-terminal MYC tags (Fuller et al., 2007) was generated in  
286 the pEF6 expression vector (Invitrogen, via Thermo Fisher Scientific, Loughborough, UK). The FLAG-human  
287 CD37 and other human tetraspanin constructs were produced using the pEF6 expression vector with an  
288 N-terminal FLAG tag as described previously (Protsy et al., 2009). HEK-293T cells were transiently  
289 transfected with hCLEC-2-MYC and FLAG epitope-tagged human tetraspanin expression constructs using  
290 polyethylenimine (Sigma-Aldrich, Paisley, UK) as described previously (Ehrhardt et al., 2006; Noy et al.,  
291 2015).

292

293

294 *Immunoprecipitation*

295 Transfected HEK-293T cells were lysed in 1% digitonin (Acros Organics (via Thermo Fisher Scientific,  
296 Loughborough, UK) and immunoprecipitated with anti-FLAG antibody (clone M2; Sigma-Aldrich, Paisley,  
297 UK) as described previously (Haining et al., 2012). Western blots were stained with anti-MYC (clone 9B11;  
298 Cell Signaling Technology, via New England Biolabs Ltd, Hitchin, UK) or rabbit anti-FLAG (Sigma-Aldrich,  
299 Paisley, UK) antibodies, followed by IRDye® 680RD- or 800CW-conjugated secondary antibodies (LI-COR  
300 Biotechnology, Cambridge, UK), and imaged using the Odyssey Infrared Imaging System (LI-COR  
301 Biotechnology, Cambridge, UK).

302

303 *Flow cytometry*

304 Murine whole blood was incubated in phosphate-buffered saline (PBS; Braun, Aschaffenburg, Germany)  
305 in presence of 1mM EDTA (Amresco, via VWR International, Amsterdam, The Netherlands) to prevent  
306 platelet aggregation, and 2% normal goat serum (NGS; Sigma-Aldrich, Zwijndrecht, The Netherlands) to  
307 block Fc receptors for 15 min at 4°C. Next, murine blood cells were stained with anti-mouse CLEC-2 (clone  
308 INU1; a kind gift from Bernhard Nieswandt, University of Würzburg, Germany) or appropriate isotype  
309 control, and subsequently with goat-anti-rat IgG-APC (BD Biosciences, Vianen, The Netherlands). To  
310 discriminate blood platelets, staining with anti-mouse CD41-PE (clone MWReg30; BD Biosciences, Vianen,  
311 The Netherlands) was performed.

312 Splenocytes or cell lines were stained for 30 min at 4°C in PBS (Braun, Aschaffenburg, Germany)  
313 containing 1% bovine serum albumin (BSA; Roche, Almere, The Netherlands) and 0.05% NaN<sub>3</sub>, and  
314 supplemented with 2% NGS (Sigma-Aldrich, Zwijndrecht, The Netherlands), with the following primary  
315 anti-mouse antibodies: CLEC-2 (clone INU1; a kind gift from Bernhard Nieswandt, University of Würzburg,  
316 Germany), CD37 (clone Duno85; Biolegend, London, UK), B220-FITC (CD45R, clone RA3-6B2; Biolegend,  
317 London, UK), CD11c-Alexa488 (clone N418; Biolegend, London, UK), NK1.1-PE (clone PK136; BD  
318 Biosciences, Vianen, The Netherlands), GR1-PE (clone RB6-8C5; Biolegend, London, UK), CD11b-PerCP  
319 (clone M1/70; Biolegend, London, UK), CD3-biotin (CD3ε, clone 145-2C11; eBioscience, via Thermo Fisher  
320 Scientific, Bleiswijk, The Netherlands), or appropriate isotype controls. This was followed by incubation  
321 with streptavidin-PerCP (Biolegend, London, UK) or goat-anti-rat IgG Alexa647 (Invitrogen, via Thermo  
322 Fisher Scientific, Bleiswijk, The Netherlands). Stained cells were analyzed using FACSCalibur (BD  
323 Biosciences, Vianen, The Netherlands) or CyanADP (Beckman Coulter, Woerden, The Netherlands) flow  
324 cytometer, and FlowJo software (TreeStar Inc., Ashland, OR, USA).

325

326 *Rhodocytin stimulation and cytokine production*

327 Single cell suspensions of splenocytes were generated by passing spleens through a 100µm cell strainer  
328 (Falcon, via Corning, Amsterdam, The Netherlands). To lyse erythrocytes, splenocytes were treated with  
329 ACK lysis buffer (0.15M NH<sub>4</sub>Cl, 10mM KHCO<sub>3</sub> (both from Merck, Amsterdam, The Netherlands), 0.1mM  
330 EDTA (Sigma-Aldrich, Zwijndrecht, The Netherlands); pH 7.3) for 2 min on ice. Splenocytes (5x10<sup>5</sup> cells)  
331 were stimulated with either 15µg rhodocytin (purified and kindly provided by Prof. Johannes Eble as  
332 previously described (Eble et al., 2001)), PMA/ionomycin (100ng/mL and 500ng/mL, both from Sigma-  
333 Aldrich, Zwijndrecht, The Netherlands), or with complete RPMI 1640 medium (unstimulated), and  
334 incubated overnight at 37°C, 5% CO<sub>2</sub>. To measure IL-6 levels in the supernatant of stimulated cell cultures,  
335 NUNC Maxisorp 96-well plates (eBioscience, via Thermo Fisher Scientific, Bleiswijk, The Netherlands) were  
336 coated with capture anti-mouse IL-6 antibody (MP5-20F3, 2µg/mL; BD Biosciences, Vianen, The  
337 Netherlands) in 0.1M carbonate buffer (pH 9.6) overnight at 4°C. Wells were blocked with PBS (Braun,  
338 Aschaffenburg, Germany) containing 1% BSA (Roche, Almere, The Netherlands) and 1% FCS (Greiner Bio-  
339 One, Alphen a/d Rijn, The Netherlands) for 1 hour at room temperature (RT), washed, and incubated with  
340 50µL of sample and standard (2-fold serial dilutions starting from 10000pg/ml) (eBioscience, via Thermo  
341 Fisher Scientific, Bleiswijk, The Netherlands). After 2-hour incubation at RT, wells were incubated with  
342 biotinylated anti-mouse IL-6 (MP5-32C11, 1µg/ml, BD Biosciences, Vianen, The Netherlands) for 1 hour at  
343 RT, followed by incubation with HRP-conjugated streptavidin (1:5000, Invitrogen, via Thermo Fisher  
344 Scientific, Bleiswijk, The Netherlands) for 30 min at RT. Complexes were visualized using TMB substrate  
345 (Sigma-Aldrich, Zwijndrecht, The Netherlands), and reactions were stopped by adding 0.8M H<sub>2</sub>SO<sub>4</sub> (Merck  
346 Millipore, Amsterdam, The Netherlands). Absorbance was measured at 450nm using an iMark plate reader  
347 (Bio-Rad, Veenendaal, The Netherlands).

348

349 *Static adhesion and migration assay*

350 Adhesion was assessed by direct microscopic observation as previously described (Butler et al., 2005). LEC  
351 in 12-well plates were washed three times with Medium 199 supplemented with 0.15% BSA Fraction V  
352 7.5% (M199BSA, both from Gibco, via Thermo Fisher Scientific, Loughborough, UK) to remove residual  
353 cytokines. BMDCs (1x10<sup>6</sup>) were added on top of the LEC monolayer and incubated for 10 min at 37°C, 5%  
354 CO<sub>2</sub>. Non-adherent cells were removed from the LECs by gentle washing three times with M199BSA  
355 medium. Imaging was performed using an Olympus Invert X70 microscope enclosed at 37°C. Digital  
356 recordings of five fields of view of the LEC surface were made using phase-contrast microscopy  
357 immediately and 10 min after washing away non-adherent cells. In between, time-lapse imaging (1 image

358 every 10 sec) was performed for 5 min of one field of view to assess cell migration at 37°C. Digitized  
359 recordings were analyzed off-line using Image-Pro software (version 6.2, DataCell, Finchampstead, UK).  
360 The numbers of adherent cells were counted in the video fields, averaged, converted to cells per mm<sup>2</sup>  
361 using the calibrated microscope field dimensions, and multiplied by the known surface area of the well to  
362 calculate the total number of adherent cells. This number was divided by the known total number of cells  
363 added to obtain the percentage of the cells that had adhered. Cell tracks of live cells were analyzed using  
364 the Manual Tracking plugin in Fiji/ImageJ software. Migration velocity was calculated as the length of each  
365 cell path/time (µm/min), and the xy trajectories were converted into mean square displacement (MSD, in  
366 µm<sup>2</sup>) as previously described (van Rijn et al., 2016).

367

### 368 *3D protrusion assay*

369 BMDCs (0.3x10<sup>6</sup>) were seeded into a 3D collagen (type I, rat tail)/matrigel matrix (both from Corning, via  
370 Thermo Fisher Scientific, Loughborough, UK) supplemented with 10% minimum essential medium alpha  
371 medium (MEMalpha, Invitrogen, via Thermo Fisher Scientific, Loughborough, UK) and 10% FCS (Greiner  
372 Bio-One, Stonehouse, UK) on glass-bottomed cell culture plates (MatTek Corporation, Bratislava, Slovakia).  
373 For CLEC-2 activation, 20µg/mL recombinant podoplanin-Fc (rPDPN-Fc; Sino Biological Inc., Beijing, China)  
374 (Acton et al., 2012) was added to the gel as all components were mixed. Gels were incubated overnight at  
375 37°C, 5% CO<sub>2</sub>. The next day, cultures were fixed with 4% paraformaldehyde (PFA; Merck, Nottingham, UK)  
376 for 3h at RT, followed by blocking and permeabilization with 3% BSA (Roche, West Sussex, UK), 1% normal  
377 mouse serum (NMS) and 0.3% Triton X-100 in 0.1M Tris (all from Sigma-Aldrich, Paisley, UK) for 2h at RT  
378 before staining. F-actin and cell nuclei were visualized using TRITC-phalloidin and DAPI, respectively  
379 (1:1000 dilution, both from Invitrogen, via Thermo Fisher Scientific, Loughborough, UK). Cells were imaged  
380 on a Leica SP5 confocal microscope, and analyzed using Fiji/ImageJ software. Z stacks of 120µm  
381 (10µm/step) were projected with ImageJ Z Project (maximum projection), and number and length of  
382 protrusions were measured. Cell morphology (= perimeter<sup>2</sup>/4πarea) was calculated using the area and  
383 perimeter of cells by manually drawing around the cell shape using F-actin staining.

384

### 385 *Microcontact printing*

386 PDMS (poly(dimethylsiloxane)) stamps with a regular pattern of 5µm circular spots were prepared as  
387 previously described (Van Den Dries et al., 2012). Stamps were incubated with 200µg/mL rPDPN-Fc (Sino  
388 Biological Inc., Beijing, China) for CLEC-2 stimulation, and 10µg/mL donkey anti-rabbit IgG (H&L)-Alexa647  
389 (Invitrogen, via Thermo Fisher Scientific, Loughborough, UK) to visualize the spots, diluted in PBS (Braun,



390 Aschaffenburg, Germany) for 1 hour at RT. Stamps were washed with demineralized water and dried under  
391 a nitrogen stream. The stamp was applied to a cleaned glass coverslip for 1 min and subsequently  
392 removed. Transfected RAW macrophages were seeded on the stamped area and incubated for 12 min at  
393 37°C. Cells were fixed with 4% PFA (Merck, Darmstadt, Germany) for 20 min at RT. Samples were washed  
394 with PBS (Braun, Aschaffenburg, Germany) and demineralized water (MilliQ; Merck Millipore, Amsterdam,  
395 The Netherlands) and embedded in Mowiol (Sigma-Aldrich, Zwijndrecht, The Netherlands). Imaging was  
396 performed on an epi-fluorescence Leica DMI6000 microscope, and plot profiles were created using  
397 Fiji/ImageJ software. For the population of cells in contact with rDPN-Fc spots, we determined the  
398 percentage showing on-stamp enrichment of mCLEC-2-GFP by independent visual analysis with support of  
399 Fiji/ImageJ software.

400

#### 401 *Statistics*

402 Statistical differences between two groups (e.g. WT and *Cd37*<sup>-/-</sup> cells) regarding IL-6 production, adhesion,  
403 CLEC-2 enrichment and NFAT-luciferase activity were determined using (un)paired Student's *t*-test or non-  
404 parametric Mann-Whitney test (in case of non-Gaussian distribution). Statistical differences between  
405 three groups (e.g. WT, *Cd37*<sup>-/-</sup> and CD11c<sup>ΔCLEC-2</sup> cells) or two or more parameters (e.g. genotype and time)  
406 were determined using two-way ANOVA with Sidak's or Tukey's multiple comparisons test. Statistical tests  
407 were performed using GraphPad Prism software, and all differences were considered to be statistically  
408 significant at  $p \leq 0.05$ .



409 **Acknowledgements**

410 We thank Prof. Steve Watson (University of Birmingham, UK; British Heart Foundation Chair (CH03/03))  
411 and Dr. Mark Wright (Monash University, Melbourne, Australia) for discussion and critical reading of the  
412 manuscript. We thank Jing Yang for her contribution to the research during her function as research  
413 assistant in the lab of Dr M.G. Tomlinson. C.M. de Winde was supported by an Erasmus+ Staff Mobility  
414 Grant, and was awarded a NWO Rubicon Postdoctoral Fellowship (019.162LW.004). A.L. Matthews was  
415 supported by a Biotechnology and Biological Sciences Research Council PhD Studentship. N.D. Tomlinson  
416 was supported by a Medical Research Council PhD Studentship. J.A.E. isolates rhodocytin within a project  
417 financed by the Deutsche Forschungsgemeinschaft (grant: SFB1009 A09). H.M. McGettrick was supported  
418 by an Arthritis Research UK Career Development Fellowship (19899). C.G. Figdor is recipient of a NWO  
419 Spinoza award, a European Research Council Advanced Grant PATHFINDER (269019), and a Koningin  
420 Wilhelmina Onderzoeksprijs award (KUN2009-4402) from the Dutch Cancer Society. S.E. Acton is recipient  
421 of a Cancer Research UK Career Development Fellowship (CRUK-A19763) and is supported by the Medical  
422 Research Council (MC\_U12266B). M.G. Tomlinson was supported by a Medical Research Council New  
423 Investigator Award (G0400247) and a British Heart Foundation Senior Fellowship (FS/08/062/25797), the  
424 latter of which also supported J. Yang. A.B. van Sriel is recipient of a Netherlands Organization for  
425 Scientific Research Grant (NWO-ALW VIDI grant 864.11.006), a NWO Gravitation Programme 2013 grant  
426 (ICI-024.002.009), a Dutch Cancer Society Grant (KUN2014-6845), and was awarded a European Research  
427 Council Consolidator Grant (Secret Surface, 724281). The authors declare no competing financial interests.

428 **References**

- 429 **Acton, S. E., Astarita, J. L., Malhotra, D., Lukacs-Kornek, V., Franz, B., Hess, P. R., Jakus, Z., Kuligowski,**  
430 **M., Fletcher, A. L., Elpek, K. G., et al.** (2012). Podoplanin-rich stromal networks induce dendritic cell  
431 motility via activation of the C-type lectin receptor CLEC-2. *Immunity* **37**, 276–89.
- 432 **Acton, S. E., Farrugia, A. J., Astarita, J. L., Mourão-Sá, D., Jenkins, R. P., Nye, E., Hooper, S., van Blijswijk,**  
433 **J., Rogers, N. C., Snelgrove, K. J., et al.** (2014). Dendritic cells control fibroblastic reticular network  
434 tension and lymph node expansion. *Nature* **514**, 498–502.
- 435 **Ahmed, S. R., McGettrick, H. M., Yates, C. M., Buckley, C. D., Ratcliffe, M. J., Nash, G. B. and Rainger, G.**  
436 **E.** (2011). Prostaglandin D2 regulates CD4+ memory T cell trafficking across blood vascular  
437 endothelium and primes these cells for clearance across lymphatic endothelium. *J. Immunol.* **187**,  
438 1432–9.
- 439 **Astarita, J. L., Cremasco, V., Fu, J., Darnell, M. C., Peck, J. R., Nieves-Bonilla, J. M., Song, K., Kondo, Y.,**  
440 **Woodruff, M. C., Gogineni, A., et al.** (2015). The CLEC-2-podoplanin axis controls the contractility of  
441 fibroblastic reticular cells and lymph node microarchitecture. *Nat. Immunol.* **16**, 75–84.
- 442 **Bertozzi, C. C., Schmaier, A. A., Mericko, P., Hess, P. R., Zou, Z., Chen, M., Chen, C.-Y., Xu, B., Lu, M., Zhou,**  
443 **D., et al.** (2010). Platelets regulate lymphatic vascular development through CLEC-2-SLP-76 signaling.  
444 *Blood* **116**, 661–70.
- 445 **Blank, N., Schiller, M., Krienke, S., Wabnitz, G., Ho, A. D. and Lorenz, H.-M.** (2007). Cholera toxin binds to  
446 lipid rafts but has a limited specificity for ganglioside GM1. *Immunol. Cell Biol.* **85**, 378–382.
- 447 **Brown, G. and Gordon, S.** (2001). Immune recognition. A new receptor for beta-glucans. *Nature* **413**, 36–  
448 7.
- 449 **Butler, L. M., Rainger, G. E., Rahman, M. and Nash, G. B.** (2005). Prolonged culture of endothelial cells  
450 and deposition of basement membrane modify the recruitment of neutrophils. *Exp. Cell Res.* **310**,  
451 22–32.
- 452 **Cambi, A., De Lange, F., Van Maarseveen, N. M., Nijhuis, M., Joosten, B., Van Dijk, E. M. H. P., De Bakker,**  
453 **B. I., Fransen, J. A. M., Bovee-Geurts, P. H. M., Van Leeuwen, F. N., et al.** (2004). Microdomains of  
454 the C-type lectin DC-SIGN are portals for virus entry into dendritic cells. *J. Cell Biol.* **164**, 145–155.
- 455 **Carmo, A. M. and Wright, M. D.** (1995). Association of the transmembrane 4 superfamily molecule CD53  
456 with a tyrosine phosphatase activity. *Eur. J. Immunol.* **25**, 2090–2095.
- 457 **Chang, C. H., Chung, C. H., Hsu, C. C., Huang, T. Y. and Huang, T. F.** (2010). A novel mechanism of cytokine  
458 release in phagocytes induced by aggretin, a snake venom C-type lectin protein, through CLEC-2  
459 ligation. *J. Thromb. Haemost.* **8**, 2563–2570.

- 460 **Charrin, S., Le Naour, F., Oualid, M., Billard, M., Faure, G., Hanash, S. M., Boucheix, C. and Rubinstein, E.**  
461 (2001). The major CD9 and CD81 molecular partner. Identification and characterization of the  
462 complexes. *J. Biol. Chem.* **276**, 14329–37.
- 463 **Charrin, S., le Naour, F., Silvie, O., Milhiet, P. E. E., Boucheix, C. and Rubinstein, E.** (2009). Lateral  
464 organization of membrane proteins: tetraspanins spin their web. *Biochem. J.* **420**, 133–154.
- 465 **Chattopadhyay, N., Wang, Z., Ashman, L. K., Brady-Kalnay, S. M. and Kreidberg, J. A.** (2003). alpha3beta1  
466 integrin-CD151, a component of the cadherin-catenin complex, regulates PTPmu expression and cell-  
467 cell adhesion. *J. Cell Biol.* **163**, 1351–1362.
- 468 **Claas, C., Stipp, C. S. and Hemler, M. E.** (2001). Evaluation of prototype transmembrane 4 superfamily  
469 protein complexes and their relation to lipid rafts. *J Biol Chem* **276**, 7974–7984.
- 470 **Colonna, M., Samaridis, J. and Angman, L.** (2000). Molecular characterization of two novel C-type lectin-  
471 like receptors, one of which is selectively expressed in human dendritic cells. *Eur. J. Immunol.* **30**,  
472 697–704.
- 473 **De Turris, V., Teloni, R., Chiani, P., Bromuro, C., Mariotti, S., Pardini, M., Nisini, R., Torosantucci, A. and**  
474 **Gagliardi, M. C.** (2015). *Candida albicans* targets a lipid raft/dectin-1 platform to enter human  
475 monocytes and induce antigen specific T cell responses. *PLoS One* **10**, 1–18.
- 476 **de Winde, C. M., Zuidscherwoude, M., Vasaturo, A., van der Schaaf, A., Figdor, C. G. and van Sriel, A.**  
477 **B.** (2015). Multispectral imaging reveals the tissue distribution of tetraspanins in human lymphoid  
478 organs. *Histochem. Cell Biol.* **144**, 133–146.
- 479 **de Winde, C. M., Veenbergen, S., Young, K. H., Xu-Monette, Z. Y., Wang, X. X., Xia, Y., Jabbar, K. J., Van**  
480 **Den Brand, M., Van Der Schaaf, A., Elfrink, S., et al.** (2016). Tetraspanin CD37 protects against the  
481 development of B cell lymphoma. *J. Clin. Invest.* **126**, 653–666.
- 482 **Dornier, E., Coumilleau, F., Ottavi, J. F., Moretti, J., Boucheix, C., Mauduit, P., Schweisguth, F. and**  
483 **Rubinstein, E.** (2012). Tspanc8 tetraspanins regulate ADAM10/Kuzbanian trafficking and promote  
484 Notch activation in flies and mammals. *J. Cell Biol.* **199**, 481–496.
- 485 **Eble, J. A., Beermann, B., Hinz, H. J. and Schmidt-Hederich, A.** (2001).  $\alpha 2\beta 1$  Integrin Is Not Recognized by  
486 Rhodocytin but Is the Specific, High Affinity Target of Rhodocetin, an RGD-independent Disintegrin  
487 and Potent Inhibitor of Cell Adhesion to Collagen. *J. Biol. Chem.* **276**, 12274–12284.
- 488 **Ehrhardt, C., Schmolke, M., Matzke, A., Knoblauch, A., Will, C., Wixler, V. and Ludwig, S.** (2006).  
489 Polyethylenimine, a cost-effective transfection reagent. *Signal Transduct.* **6**, 179–184.
- 490 **Figdor, C. G. and van Sriel, A. B.** (2009). Fungal pattern-recognition receptors and tetraspanins: partners  
491 on antigen-presenting cells. *Trends Immunol* **31**, 91–96.

- 492 **Fuller, G. L. J., Williams, J. A. E., Tomlinson, M. G., Eble, J. A., Hanna, S. L., Pöhlmann, S., Suzuki-Inoue,**  
493 **K., Ozaki, Y., Watson, S. P. and Pearce, A. C.** (2007). The C-type lectin receptors CLEC-2 and Dectin-  
494 1, but not DC-SIGN, signal via a novel YXXL-dependent signaling cascade. *J. Biol. Chem.* **282**, 12397–  
495 12409.
- 496 **Gartlan, K. H., Belz, G. T., Tarrant, J. M., Minigo, G., Katsara, M., Sheng, K.-C. C., Sofi, M., van Sriel, A.**  
497 **B., Apostolopoulos, V., Plebanski, M., et al.** (2010). A complementary role for the tetraspanins CD37  
498 and Tssc6 in cellular immunity. *J Immunol* **185**, 3158–3166.
- 499 **Gartlan, K. H., Wee, J. L., Demaria, M. C., Nastovska, R., Chang, T. M., Jones, E. L., Apostolopoulos, V.,**  
500 **Pietersz, G. A., Hickey, M. J., van Sriel, A. B., et al.** (2013). Tetraspanin CD37 contributes to the  
501 initiation of cellular immunity by promoting dendritic cell migration. *Eur J Immunol* **43**, 1208–1219.
- 502 **Goodridge, H. S., Reyes, C. N., Becker, C. a, Tamiko, R., Ma, J., Wolf, A. J., Bose, N., Chan, A. S. H., Andrew,**  
503 **S., Danielson, M. E., et al.** (2011). Activation of the innate immune receptor Dectin-1 upon formation  
504 of a “phagocytic synapse.” *Nature* **472**, 471–475.
- 505 **Haining, E. J., Yang, J., Bailey, R. L., Khan, K., Collier, R., Tsai, S., Watson, S. P., Frampton, J., Garcia, P.**  
506 **and Tomlinson, M. G.** (2012). The TspanC8 subgroup of tetraspanins interacts with A disintegrin and  
507 metalloprotease 10 (ADAM10) and regulates its maturation and cell surface expression. *J. Biol. Chem.*  
508 **287**, 39753–65.
- 509 **Hemler, M. E.** (2005). Tetraspanin functions and associated microdomains. *Nat Rev Mol Cell Biol* **6**, 801–  
510 811.
- 511 **Hughes, C. E., Pollitt, A. Y., Mori, J., Eble, J. A., Tomlinson, M. G., Hartwig, J. H., O’Callaghan, C. A.,**  
512 **Fütterer, K. and Watson, S. P.** (2010). CLEC-2 activates Syk through dimerization. *Blood* **115**, 2947–  
513 2955.
- 514 **Johnson, L. A. and Jackson, D. G.** (2013). The chemokine CX3CL1 promotes trafficking of dendritic cells  
515 through inflamed lymphatics. *J Cell Sci* **126**, 5259–5270.
- 516 **Jones, E. L., Wee, J. L., Demaria, M. C., Blakeley, J., Ho, P. K., Vega-Ramos, J., Villadangos, J. A., van Sriel,**  
517 **A. B., Hickey, M. J., Hammerling, G. J., et al.** (2016). Dendritic Cell Migration and Antigen  
518 Presentation Are Coordinated by the Opposing Functions of the Tetraspanins CD82 and CD37. *J.*  
519 *Immunol.* **196**, 978–87.
- 520 **Kerrigan, A. M., Dennehy, K. M., Mourão-Sá, D., Faro-Trindade, I., Willment, J. A., Taylor, P. R., Eble, J.**  
521 **A., Reis e Sousa, C. and Brown, G. D.** (2009). CLEC-2 is a phagocytic activation receptor expressed on  
522 murine peripheral blood neutrophils. *J. Immunol.* **182**, 4150–7.
- 523 **Knobeloch, K. P., Wright, M. D., Ochsenbein, A. F., Liesenfeld, O., Löhler, J., Zinkernagel, R. M., Horak, I.**

- 524 **and Orinska, Z.** (2000). Targeted inactivation of the tetraspanin CD37 impairs T-cell-dependent B-cell  
525 response under suboptimal costimulatory conditions. *Mol. Cell. Biol.* **20**, 5363–5369.
- 526 **Lapalombella, R., Yeh, Y.-Y. Y., Wang, L., Ramanunni, A., Rafiq, S., Jha, S., Staubli, J., Lucas, D. M., Mani,**  
527 **R., Herman, S. E. M., et al.** (2012). Tetraspanin CD37 directly mediates transduction of survival and  
528 apoptotic signals. *Cancer Cell* **21**, 694–708.
- 529 **Levy, S. and Shoham, T.** (2005). The tetraspanin web modulates immune-signalling complexes. *Nat Rev*  
530 *Immunol* **5**, 136–148.
- 531 **Lowe, K. L., Navarro-Nuñez, L., Bénézec, C., Nayar, S., Kingston, B. L., Nieswandt, B., Barone, F., Watson,**  
532 **S. P., Buckley, C. D. and Desanti, G. E.** (2015). The expression of mouse CLEC-2 on leucocyte subsets  
533 varies according to their anatomical location and inflammatory state. *Eur. J. Immunol.* n/a--n/a.
- 534 **Lutz, M. B., Kukutsch, N., Ogilvie, A. L. , Rößner, S., Koch, F., Romani, N. and Schuler, G.** (1999). An  
535 advanced culture method for generating large quantities of highly pure dendritic cells from mouse  
536 bone marrow. *J. Immunol. Methods* **223**, 77–92.
- 537 **Maddaluno, L., Verbrugge, S. E., Martinoli, C., Matteoli, G., Chiavelli, A., Zeng, Y., Williams, E. D.,**  
538 **Rescigno, M. and Cavallaro, U.** (2009). The adhesion molecule L1 regulates transendothelial  
539 migration and trafficking of dendritic cells. *J. Exp. Med.* **206**, 623–35.
- 540 **Manne, B. K., Badolia, R., Dangelmaier, C. A. and Kunapuli, S. P.** (2015). C-type lectin like receptor 2 (CLEC-  
541 2) signals independently of lipid raft microdomains in platelets. *Biochem. Pharmacol.* **93**, 163–170.
- 542 **Mantegazza, A. R., Barrio, M. M., Moutel, S., Bover, L., Weck, M., Brossart, P., Teillaud, J. L. and Mordoh,**  
543 **J.** (2004). CD63 tetraspanin slows down cell migration and translocates to the endosomal-lysosomal-  
544 MHCs route after extracellular stimuli in human immature dendritic cells. *Blood* **104**, 1183–1190.
- 545 **Meyer-Wentrup, F., Figdor, C. G., Ansems, M., Brossart, P., Wright, M. D., Adema, G. J. and van Spriel,**  
546 **A. B.** (2007). Dectin-1 interaction with tetraspanin CD37 inhibits IL-6 production. *J. Immunol.* **178**,  
547 154–62.
- 548 **Mócsai, A., Ruland, J. and Tybulewicz, V. L. J.** (2010). The SYK tyrosine kinase: a crucial player in diverse  
549 biological functions. *Nat. Rev. Immunol.* **10**, 387–402.
- 550 **Mourão-Sá, D., Robinson, M. J., Zelenay, S., Sancho, D., Chakravarty, P., Larsen, R., Plantinga, M., Van**  
551 **Rooijen, N., Soares, M. P., Lambrecht, B., et al.** (2011). CLEC-2 signaling via Syk in myeloid cells can  
552 regulate inflammatory responses. *Eur. J. Immunol.* **41**, 3040–53.
- 553 **Nobes, C. D. and Hall, A.** (1995). Rho, Rac, and Cdc42 GTPases Regulate the Assembly of Multimolecular  
554 Focal Complexes Associated with Actin Stress Fibers, Lamellipodia, and Filopodia. *Cell* **81**, 53–62.
- 555 **Noy, P., Lodhia, P., Khan, K., Zhuang, X., Ward, D., Verissimo, A., Bacon, A. and Bicknell, R.** (2015).

- 556 Blocking CLEC14A-MMRN2 binding inhibits sprouting angiogenesis and tumour growth. *Oncogene*  
557 **34**, 5821–31.
- 558 **Olson, M. and Sahai, E.** (2009). The actin cytoskeleton in cancer cell motility. *Clin. Exp. Metastasis* **26**, 273–  
559 287.
- 560 **Parri, M. and Chiarugi, P.** (2010). Rac and Rho GTPases in cancer cell motility control. *Cell Commun. Signal.*  
561 **8**, 23.
- 562 **Podgrabinska, S., Kamalu, O., Mayer, L., Shimaoka, M., Snoeck, H., Randolph, G. J. and Skobe, M.** (2009).  
563 Inflamed Lymphatic Endothelium Suppresses Dendritic Cell Maturation and Function via Mac-  
564 1/ICAM-1-Dependent Mechanism. *J. Immunol.* **183**, 1767–1779.
- 565 **Pollitt, A. Y., Grygielska, B., Leblond, B., Désiré, L., Eble, J. A. and Watson, S. P.** (2010). Phosphorylation  
566 of CLEC-2 is dependent on lipid rafts, actin polymerization, secondary mediators, and Rac. *Blood* **115**,  
567 2938–2946.
- 568 **Pollitt, A. Y., Poulter, N. S., Gitz, E., Navarro-nuñez, L., Wang, Y., Hughes, E., Thomas, S. G., Douglas, M.**  
569 **R., Dylan, M., Jackson, D. G., et al.** (2014). Syk and Src Family Kinases Regulate C-type Lectin Receptor  
570 2 (CLEC-2)-mediated Clustering of Podoplanin and Platelet Adhesion to Lymphatic Endothelial Cells.  
571 *J Biol Chem* **289**, 35695–35710.
- 572 **Protsy, M. B., Watkins, N. A., Colombo, D., Thomas, S. G., Heath, V. L., Herbert, J. M., Bicknell, R., Senis,**  
573 **Y. A., Ashman, L. K., Berditchevski, F., et al.** (2009). Identification of Tspan9 as a novel platelet  
574 tetraspanin and the collagen receptor GPVI as a component of tetraspanin microdomains. *Biochem J*  
575 **417**, 391–400.
- 576 **Rocha-Perugini, V., Martínez del Hoyo, G., González-Granado, J. M., Ramírez-Huesca, M., Zorita, V.,**  
577 **Rubinstein, E., Boucheix, C. and Sánchez-Madrid, F.** (2017). CD9 regulates MHC-II trafficking in  
578 Monocyte-derived Dendritic Cells. *Mol. Cell. Biol.* **37**, MCB.00202-17.
- 579 **Serru, V., Le Naour, F., Billard, M., Azorsa, D. O., Lanza, F., Boucheix, C. and Rubinstein, E.** (1999).  
580 Selective tetraspan-integrin complexes (CD81/alpha4beta1, CD151/alpha3beta1,  
581 CD151/alpha6beta1) under conditions disrupting tetraspan interactions. *Biochem. J.* **340**, 103–111.
- 582 **Sheng, K.-C. C., van Spriel, A. B., Gartlan, K. H., Sofi, M., Apostolopoulos, V., Ashman, L. and Wright, M.**  
583 **D.** (2009). Tetraspanins CD37 and CD151 differentially regulate Ag presentation and T-cell co-  
584 stimulation by DC. *Eur. J. Immunol.* **39**, 50–5.
- 585 **Suzuki-Inoue, K., Fuller, G. L. J., García, A., Eble, J. A., Pöhlmann, S., Inoue, O., Gartner, T. K., Hugan, S.**  
586 **C., Pearce, A. C., Laing, G. D., et al.** (2006). A novel Syk-dependent mechanism of platelet activation  
587 by the C-type lectin receptor CLEC-2. *Blood* **107**, 542–9.



- 588 **Suzuki-Inoue, K., Inoue, O., Ding, G., Nishimura, S., Hokamura, K., Eto, K., Kashiwagi, H., Tomiyama, Y.,**  
589 **Yatomi, Y., Umemura, K., et al.** (2010). Essential in vivo roles of the C-type lectin receptor CLEC-2:  
590 embryonic/neonatal lethality of CLEC-2-deficient mice by blood/lymphatic misconnections and  
591 impaired thrombus formation of CLEC-2-deficient platelets. *J. Biol. Chem.* **285**, 24494–507.
- 592 **Tarrant, J. M., Robb, L., van Sriel, A. B. and Wright, M. D.** (2003). Tetraspanins: molecular organisers of  
593 the leukocyte surface. *Trends Immunol* **24**, 610–617.
- 594 **Tejera, E., Rocha-Perugini, V., López-Martín, S., Pérez-Hernández, D., Bachir, A. I., Horwitz, A. R.,**  
595 **Vázquez, J., Sánchez-Madrid, F. and Yáñez-Mo, M.** (2013). CD81 regulates cell migration through its  
596 association with Rac GTPase. *Mol Biol Cell* **24**, 261–273.
- 597 **Van Den Dries, K., Van Helden, S. F. G., Riet, J. Te, Diez-Ahedo, R., Manzo, C., Oud, M. H. M., Van**  
598 **Leeuwen, F. N., Brock, R., Garcia-Parajo, M. F., Cambi, A., et al.** (2012). Geometry sensing by  
599 dendritic cells dictates spatial organization and PGE 2-induced dissolution of podosomes. *Cell. Mol.*  
600 *Life Sci.* **69**, 1889–1901.
- 601 **van Deventer, S. J., Dunlock, V. M. E. and van Sriel, A. B.** (2017). Molecular interactions shaping the  
602 tetraspanin web. *Biochem. Soc. Trans.* **45**, 741–750.
- 603 **van Rijn, A., Paulis, L., Te Riet, J., Vasaturo, A., Reinieren-Beeren, I., van der Schaaf, A., Kuipers, A. J.,**  
604 **Schulte, L. P., Jongbloets, B. C., Pasterkamp, R. J., et al.** (2016). Semaphorin 7A Promotes  
605 Chemokine-Driven Dendritic Cell Migration. *J. Immunol.* **196**, 459–68.
- 606 **van Sriel, A. B., Puls, K. L., Sofi, M., Pouniotis, D., Hochrein, H., Orinska, Z., Knobloch, K.-P. P.,**  
607 **Plebanski, M. and Wright, M. D.** (2004). A regulatory role for CD37 in T cell proliferation. *J. Immunol.*  
608 **172**, 2953–61.
- 609 **van Sriel, A. B., de Keijzer, S., van der Schaaf, A., Gartlan, K. H., Sofi, M., Light, A., Linsen, P. C.,**  
610 **Boezeman, J. B., Zuidscherwoude, M., Reinieren-Beeren, I., et al.** (2012). The tetraspanin CD37  
611 orchestrates the  $\alpha(4)\beta(1)$  integrin-Akt signaling axis and supports long-lived plasma cell survival. *Sci.*  
612 *Signal.* **5**, ra82.
- 613 **Worbs, T., Hammerschmidt, S. I. and Förster, R.** (2017). Dendritic cell migration in health and disease.  
614 *Nat. Rev. Immunol.* **17**, 30–48.
- 615 **Wright, M. D., Moseley, G. W. and van Sriel, A. B.** (2004). Tetraspanin microdomains in immune cell  
616 signalling and malignant disease. *Tissue Antigens* **64**, 533–542.
- 617 **Xu, S., Huo, J., Gunawan, M., Su, I. H. and Lam, K. P.** (2009). Activated dectin-1 localizes to lipid raft  
618 microdomains for signaling and activation of phagocytosis and cytokine production in dendritic cells.  
619 *J. Biol. Chem.* **284**, 22005–22011.

- 620 **Yan, J., Wu, B., Huang, B., Huang, S., Jiang, S. and Lu, F.** (2014). Dectin-1-CD37 association regulates IL-6  
621 expression during *Toxoplasma gondii* infection. *Parasitol. Res.* **113**, 2851–60.
- 622 **Zeiler, M., Moser, M. and Mann, M.** (2014). Copy number analysis of the murine platelet proteome  
623 spanning the complete abundance range. *Mol. Cell. Proteomics* **13**, 3435–45.
- 624 **Zhang, J., Somani, A.-K. and Siminovitch, K.** (2000). Roles of the SHP-1 tyrosine phosphatase in the  
625 negative regulation of cell signalling. *Semin. Immunol.* **12**, 361–78.
- 626 **Zhang, X. A., Bontrager, A. L. and Hemler, M. E.** (2001). Transmembrane-4 superfamily proteins associate  
627 with activated protein kinase C (PKC) and link PKC to specific beta(1) integrins. *J Biol Chem* **276**,  
628 25005–25013.
- 629 **Zimmerman, B., McMillan, B., Seegar, T., Kruse, A. and Blacklow, S.** (2016). Crystal Structure of Human  
630 Tetraspanin CD81 Reveals a Conserved Intramembrane Binding Cavity. *FASEB J.* **30**, lb71-lb71.
- 631 **Zuidscherwoude, M., de Winde, C. M., Cambi, A. and van Sriel, A. B.** (2014). Microdomains in the  
632 membrane landscape shape antigen-presenting cell function. *J. Leukoc. Biol.* **95**, 251–63.
- 633 **Zuidscherwoude, M., Göttfert, F., Dunlock, V. M. E., Figdor, C. G., van den Bogaart, G. and Sriel, A. B.**  
634 **Van** (2015). The tetraspanin web revisited by super-resolution microscopy. *Sci. Rep.* **5**, 12201.
- 635 **Zuidscherwoude, M., Worah, K., van der Schaaf, A., Buschow, S. I. and van Sriel, A. B.** (2017a).  
636 Differential expression of tetraspanin superfamily members in dendritic cell subsets. *PLoS One* **12**,  
637 e0184317.
- 638 **Zuidscherwoude, M., Dunlock, V. M. E., Bogaart, G. Van Den, Schaaf, A. Van Der, Oostrum, J. Van,**  
639 **Goedhart, J., IntHout, J., Hämmerling, G. J., Tanaka, S., Nadler, A., et al.** (2017b). Tetraspanin  
640 microdomains control localized protein kinase C signaling in B cells. *Sci. Rep.* **10**, eaag2755.
- 641



## Figure 1

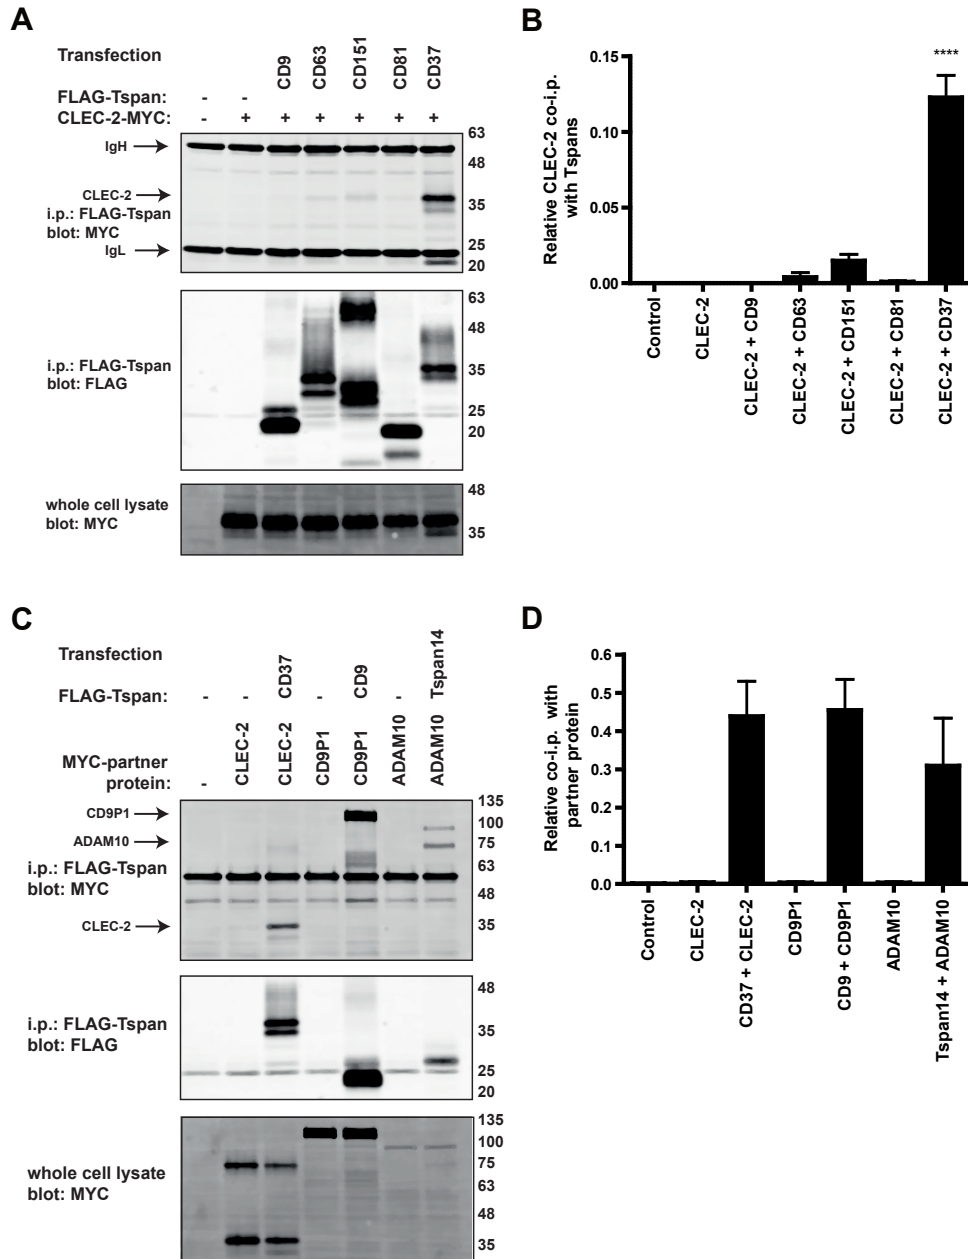

642  
 643 **Figure 1. CLEC-2 specifically interacts with tetraspanin CD37.** (A) HEK-293T cells were co-transfected with MYC-tagged human  
 644 CLEC-2 and FLAG-tagged human tetraspanins (CD9, CD63, CD151, CD81 or CD37), or mock transfected (-). Cells were lysed in 1%  
 645 digitonin and immunoprecipitated with an anti-FLAG antibody. Immunoprecipitated proteins were blotted with anti-MYC  
 646 antibody (top panel) or anti-FLAG antibody (middle panel). Whole cell lysates were probed with the anti-MYC antibody (bottom  
 647 panel). (B) Quantification of (A); amount of MYC-tagged CLEC-2 co-precipitated was normalized to the amount of tetraspanins on  
 648 the beads. Data are shown as mean+SEM from three independent experiments. Data were normalized by log transformation and  
 649 statistically analyzed using one-way ANOVA with a Tukey's multiple comparison test compared with the mean of every other  
 650 column (\*\*\*\* $p < 0.0001$ ). (C) HEK-293T cells were co-transfected with MYC-tagged human CLEC-2, CD9-P1 or ADAM10 expression  
 651 constructs and FLAG-tagged CD37, CD9 or Tspan14 tetraspanins, or mock transfected (-). Cells were lysed in 1% digitonin and  
 652 immunoprecipitated with an anti-FLAG antibody. Immunoprecipitated proteins were blotted with anti-MYC antibody (top panel)  
 653 or anti-FLAG antibody (lower panel). Whole cell lysates were probed with the anti-MYC antibody (middle panel). (D) Quantification  
 654 of (C); amount of MYC-tagged partner co-precipitated was normalized to the amount of tetraspanins on the beads. Data are shown  
 655 as mean+SEM from three independent experiments.

## Figure 2

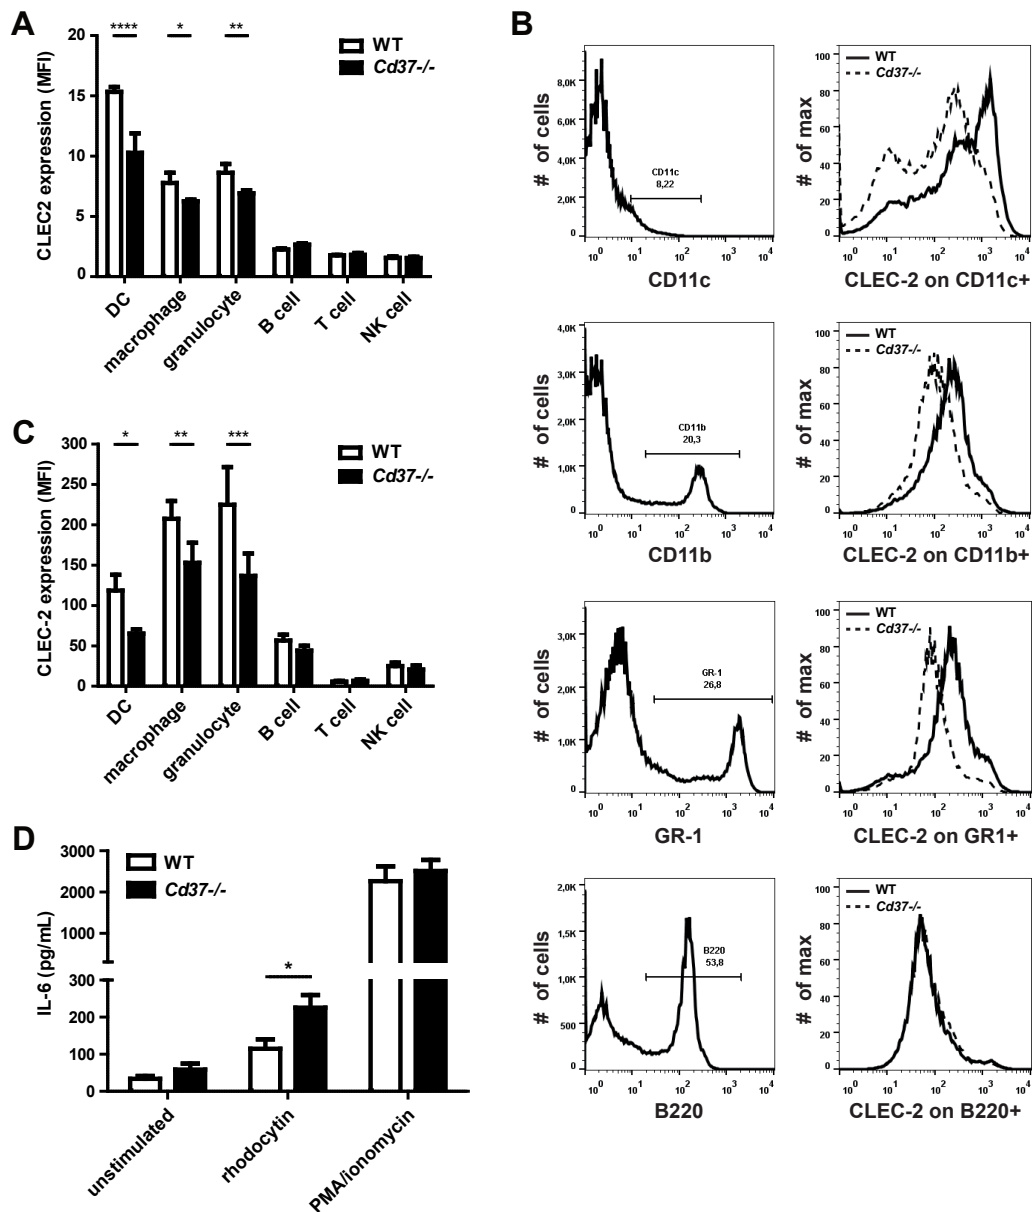

656  
 657 **Figure 2. CD37-deficiency impairs CLEC-2 expression and myeloid cell function.** (A-C) CD11c was used to stain DCs, CD11b for  
 658 macrophages, GR-1<sup>high</sup> for granulocytes, B220 for B cells, CD3ε for T cells and NK1.1 for NK cells. (A) Quantification of flow  
 659 cytometric analysis of CLEC-2 expression of naive WT (white bars) and Cd37<sup>-/-</sup> (black bars) cells. Values are corrected for isotype  
 660 controls. MFI = mean fluorescence intensity. Data are shown as mean±SD from n=2-3 mice per genotype. Two-way ANOVA with  
 661 Sidak's multiple comparisons test, \*p<0.05, \*\*p<0.01, \*\*\*p<0.0001. (B) Flow cytometric analysis of CLEC-2 expression (antibody  
 662 clone INU-1) on splenic immune cell subsets in WT (black line) and Cd37<sup>-/-</sup> (dashed line) mice 24h post-i.p. injection with LPS.  
 663 Representative FACS plots for one WT and one Cd37<sup>-/-</sup> mouse per immune cell type are shown. (C) Quantification of flow  
 664 cytometric analysis of CLEC-2 expression of *in vivo* LPS stimulated WT (white bars) and Cd37<sup>-/-</sup> (black bars) cells. Values are  
 665 corrected for isotype controls. MFI = mean fluorescence intensity. Data are shown as mean±SD from n=2-3 mice per genotype.  
 666 Two-way ANOVA with Sidak's multiple comparisons test, \*p<0.05, \*\*p<0.01, \*\*\*p<0.001. (D) IL-6 production (in pg/mL) by total  
 667 splenocytes from naive WT (white bars) and Cd37<sup>-/-</sup> (black bars) mice after *ex vivo* stimulation with medium (unstimulated,  
 668 negative control), 15µg/mL rhodocytin (CLEC-2 agonist) or PMA/ionomycin (positive control). Data are shown as mean±SEM from  
 669 3 independent experiments, total n=6-8 mice per genotype. Non-parametric Mann-Whitney test, two-tailed, \*p=0.0215.

### Figure 3

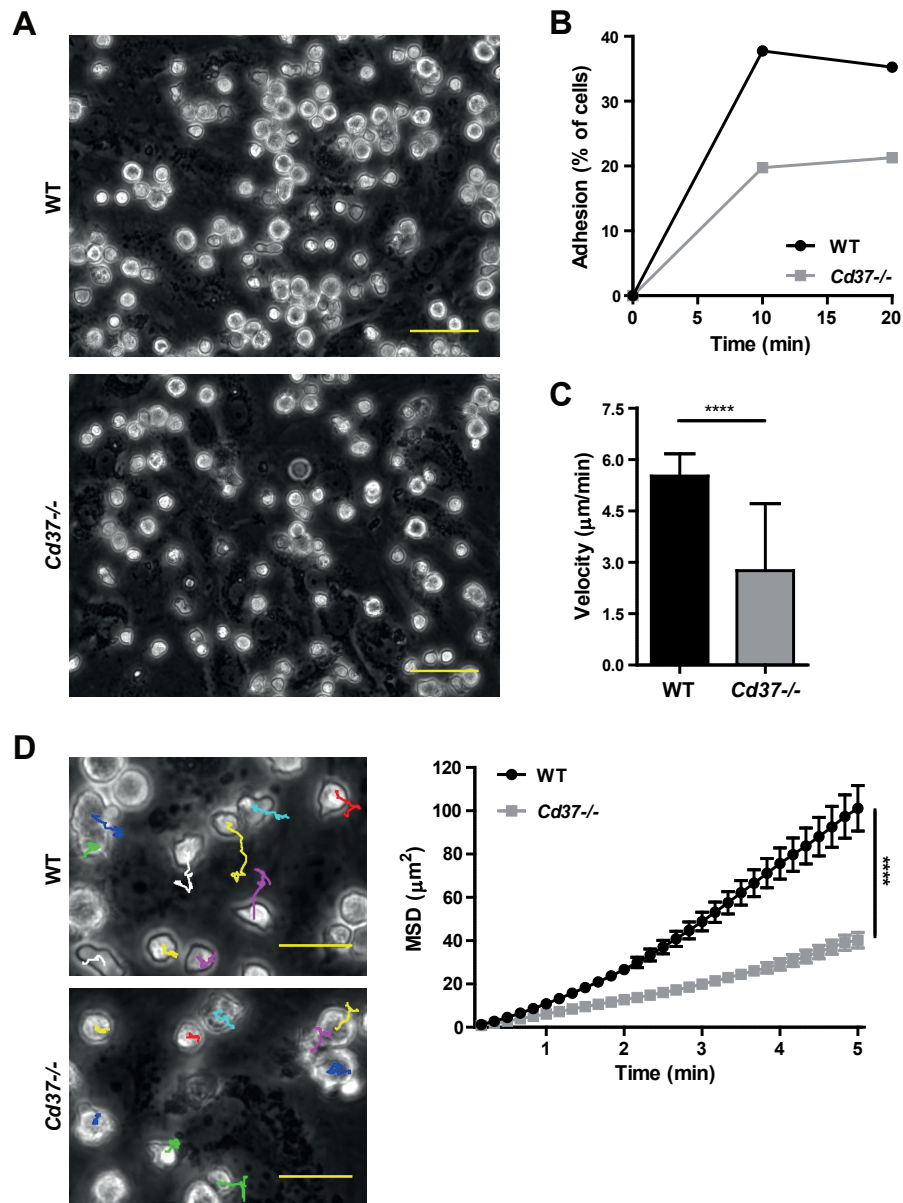

670  
 671 **Figure 3. CD37 controls DC adhesion, migration velocity and displacement on lymphatic endothelial cells. (A)** Adherence of WT  
 672 (left) and *Cd37*<sup>-/-</sup> (right) DCs on TNF $\alpha$ -stimulated lymphatic endothelial cells (LEC). One representative image per genotype is  
 673 shown. Scale bar = 50 $\mu\text{m}$ . **(B)** Adhesion (% of total cells added per well) of WT (black line) and *Cd37*<sup>-/-</sup> (grey line) DCs on LECs for  
 674 the duration of the experiment. Data shown from one representative experiment. Experiments were repeated two times yielding  
 675 similar results. **(C)** Migration velocity ( $\mu\text{m}/\text{min}$ ) of WT (white box) and *Cd37*<sup>-/-</sup> (grey box) DCs over LECs. Bars represent median  
 676 with interquartile range from two independent experiments, n=107-115 cells per genotype, respectively. Non-parametric Mann  
 677 Whitney test, two-tailed, \*\*\*\*p<0.0001. **(D)** Left: zoom of field of view shown in **(A)** with individual cell tracks. Tracking paths of  
 678 each cell of one representative experiment are shown in Supplementary Movies 1A-B. Upper image= WT, lower image = *Cd37*<sup>-/-</sup>.  
 679 Scale bar = 25 $\mu\text{m}$ . Right: Mean square displacement (MSD, in  $\mu\text{m}^2$ ) of WT (black line) and *Cd37*<sup>-/-</sup> (grey line) DCs on LEC. Data are  
 680 shown as mean $\pm$ SEM from two independent experiments. Two-way ANOVA with Sidak's multiple comparisons, \*\*\*\*p<0.0001 at  
 681 t=5 min.

## Figure 4

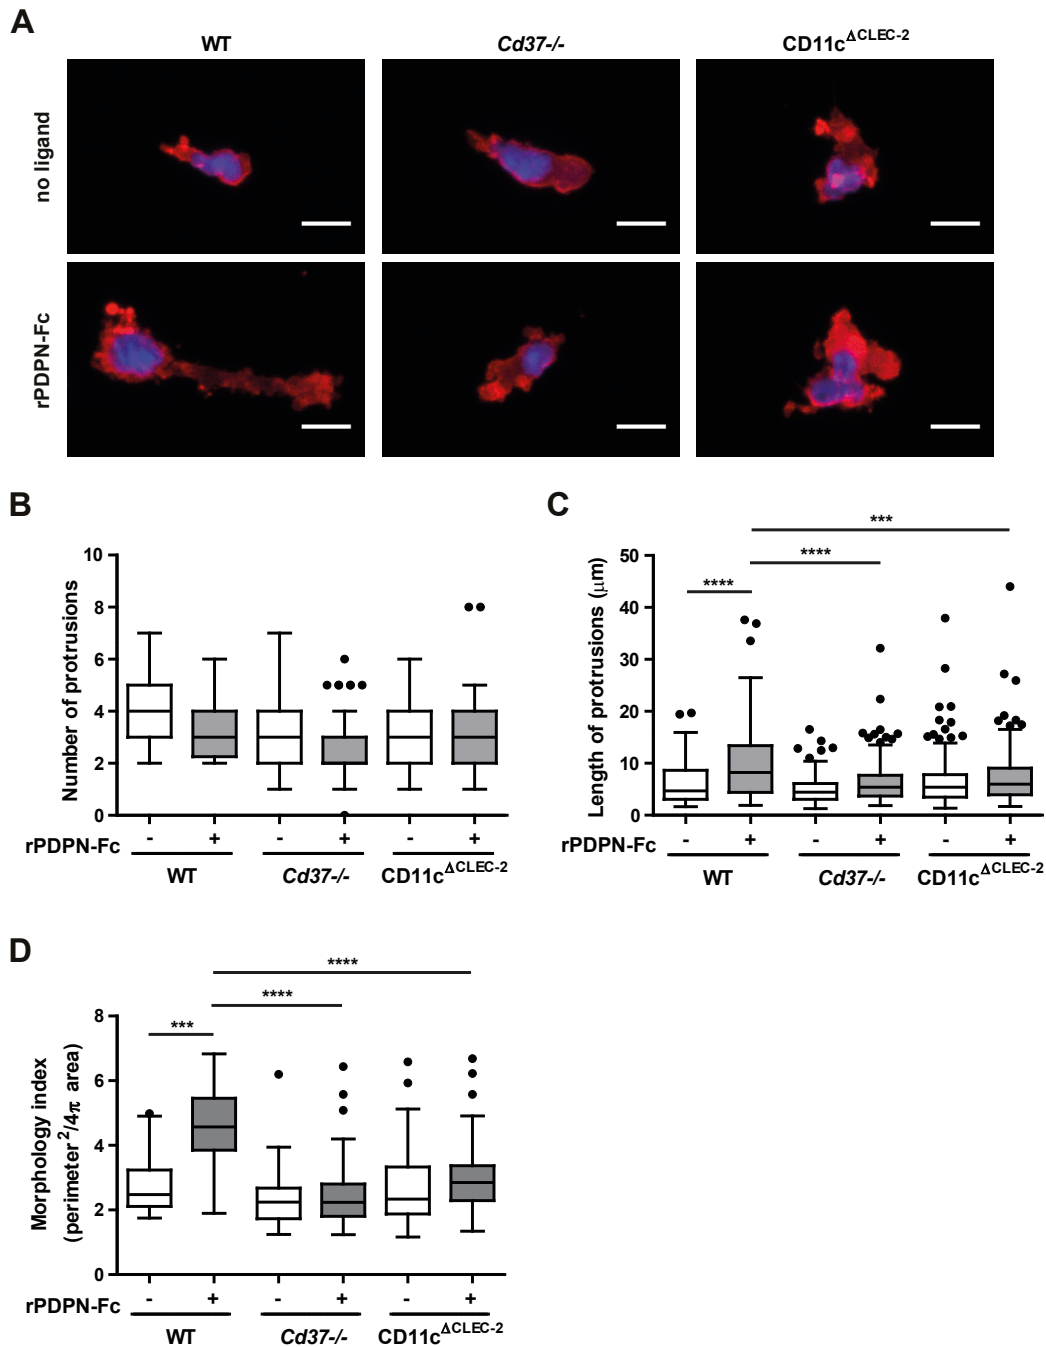

682  
683  
684 **Figure 4. CD37 controls formation of actin protrusions by DCs in response to podoplanin.** (A) WT (left), *Cd37*<sup>-/-</sup> (middle) or  
685 *CD11c*<sup>ΔCLEC-2</sup> (right) DCs were stimulated in a 3D collagen gel with (bottom row) or without (upper row) recombinant podoplanin-  
686 Fc (rPDPN-Fc). Cells were stained for F-actin (red) and nucleus (blue) and imaged with a Leica SP5 confocal fluorescence  
687 microscope. One representative cell is shown for each condition (overview with more cells is provided in Supplementary Figure  
688 2). Scale bar = 10μm. (B-D) Number (B) and length (C) of actin protrusions, and morphology index (D) of WT (left), *Cd37*<sup>-/-</sup> (middle)  
689 or *CD11c*<sup>ΔCLEC-2</sup> (right) BMDCs upon rPDPN-Fc stimulation (grey boxes) compared to no ligand (white boxes). Data are shown as  
690 Tukey Box & whiskers from 3 independent experiments, total n=3 mice per genotype. In Tukey Box & whiskers, black dots are  
691 determined as outliers; i.e. data points outside the 25<sup>th</sup> and 75<sup>th</sup> percentile, minus or plus the 1.5 interquartile range, respectively.  
Two-way ANOVA with Tukey's multiple comparisons, \*\*\*p<0.001, \*\*\*\*p<0.0001.

**Figure 5**

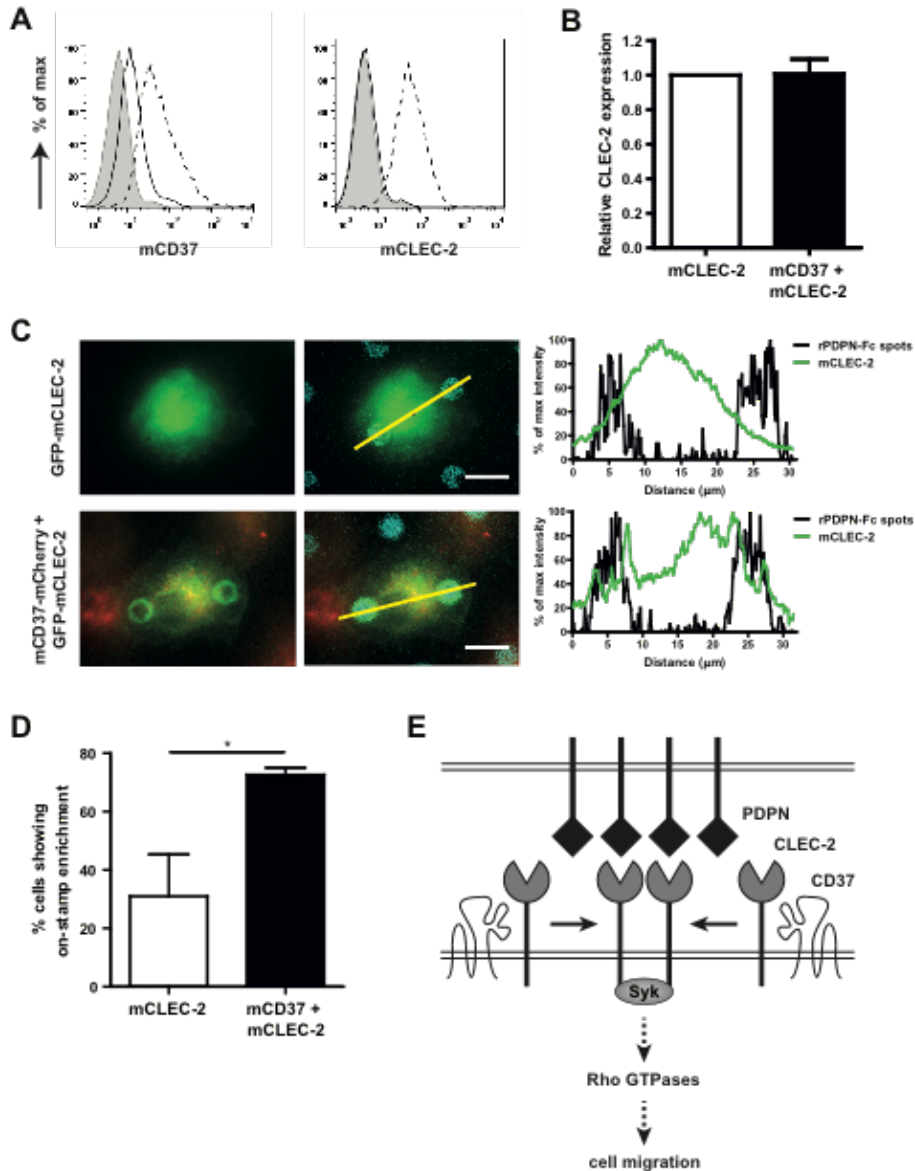

692  
 693 **Figure 5. CD37 drives CLEC-2 recruitment to podoplanin and directly interacts with CLEC-2.** (A) Membrane expression of murine  
 694 CD37 (mCD37; left) and murine CLEC-2 (mCLEC-2; right) on mock (black line) or transfected (dashed line) RAW macrophages  
 695 determined by flow cytometry. Histograms show mCD37 (left) or mCLEC-2 (right) membrane expression on live cells that were  
 696 gated on mCD37-mCherry or GFP-mCLEC-2 positivity, respectively. Grey = isotype control. Raw flow cytometry data are shown in  
 697 Supplementary Figure 3. (B) Relative CLEC-2 membrane expression in RAW cells transfected with GFP-mCLEC-2 (white bar) or  
 698 mCD37-mCherry (black bar). Flow cytometry results from panel A are normalized per experiment to the level of CLEC-2 membrane  
 699 expression in RAW cells transfected with GFP-mCLEC-2, which was set at 1. Data are shown as mean+SEM from four independent  
 700 experiments. (C) GFP-mCLEC-2 (upper row) or in combination with mCD37-mCherry (bottom row) transfected RAW macrophages  
 701 were incubated on recombinant podoplanin-Fc (rPDPN-Fc) spots and analyzed after 12 min using an epi-fluorescence microscope.  
 702 Left: Green = GFP, red = mCherry, blue = rPDPN-Fc spots. One representative cell shown per condition (three more representative  
 703 cells per condition are shown in Supplementary Figure 3). Scale bar = 10μm. Right: Graphs represent intensity profile of GFP-  
 704 mCLEC-2 (green line) or rPDPN-Fc spot (black line) across the yellow line. (D) Percentage of GFP-mCLEC-2 (white bar) or in  
 705 combination with mCD37-mCherry (black bar) transfected RAW macrophages showing enrichment of GFP-mCLEC-2 on rPDPN-Fc  
 706 spots. Data are shown as mean+SEM from three independent experiments (in total 54-56 cells per condition). Paired Student's *t*-  
 707 test, one-tailed, \*p=0.0372. (E) Model illustrating that CD37 drives CLEC-2 recruitment in response to its ligand podoplanin and as  
 708 such regulates DC migration. CLEC-2-induced Syk activation leads to DC migration most likely via changes in the activity of Rho  
 709 GTPases.
